# Supplementary material for: Metabolite profiling and wound-healing activity of Boerhavia diffusa leaf extracts using in vitro and in vivo models
Source: PubMed Central journal article supplement — J Tradit Complement Med. 2019 Feb 19;10(1):52–9. doi: 10.1016/j.jtcme.2019.02.002 (PMC6957803; doi:10.1016/j.jtcme.2019.02.002), 2019-02-19
Supplement: mmc1.pdf [file mmc1.pdf]

## Supplementary Material

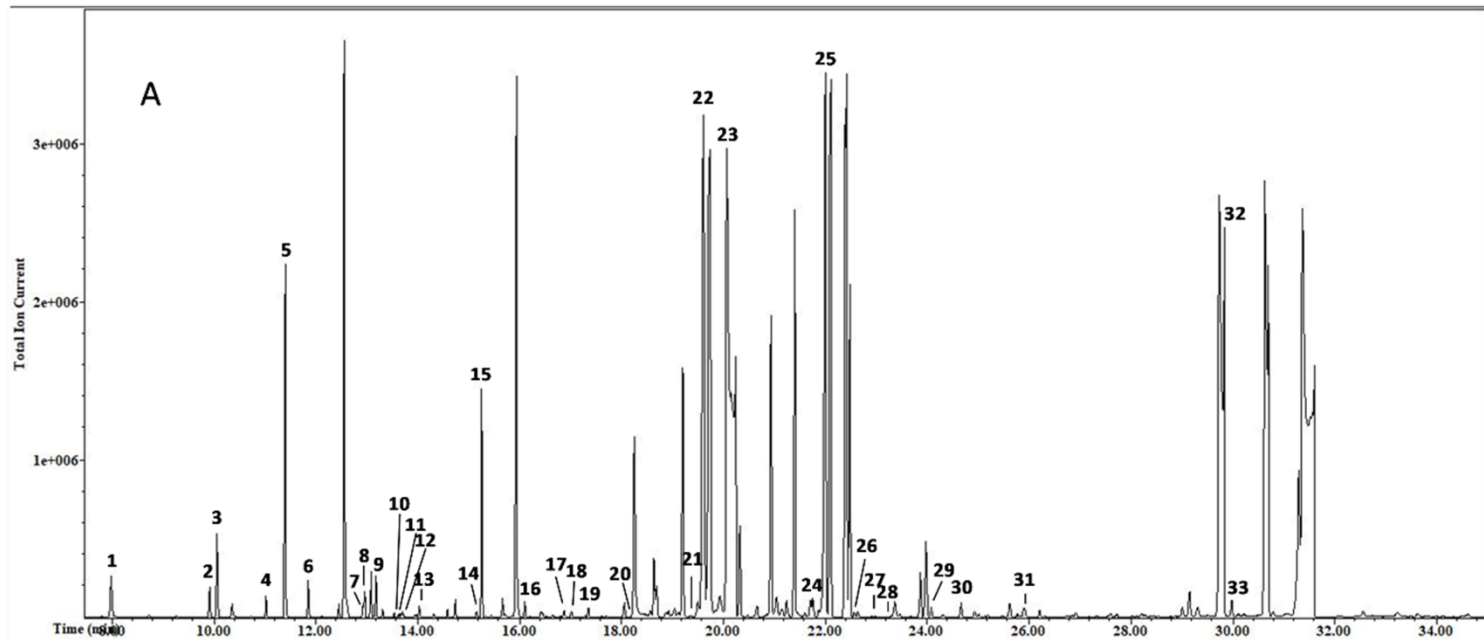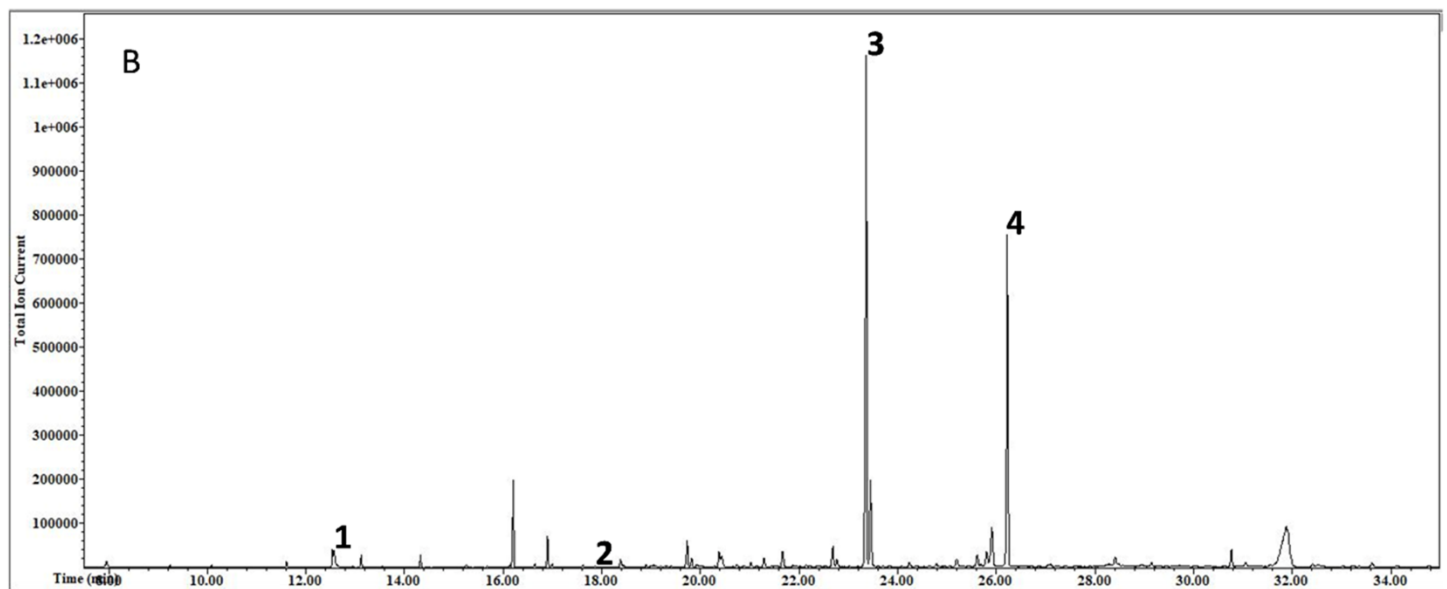

**Supplementary Fig S1.** Typical GC-MS chromatograms (TIC): (A) methanol extract (ME); (B) chloroform extract (CE) of leaves of *B. diffusa*.

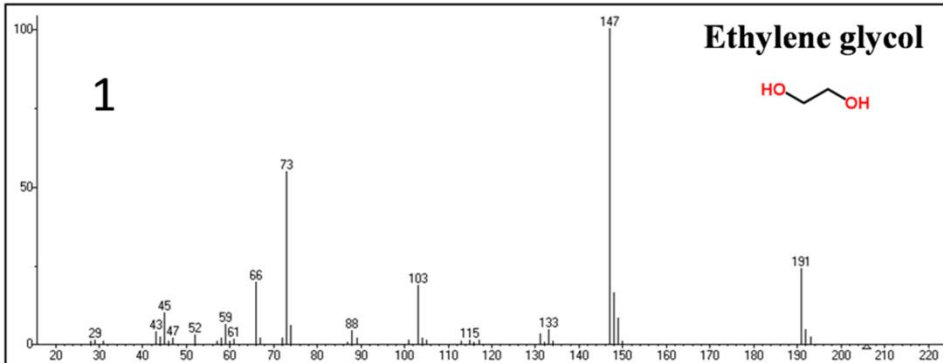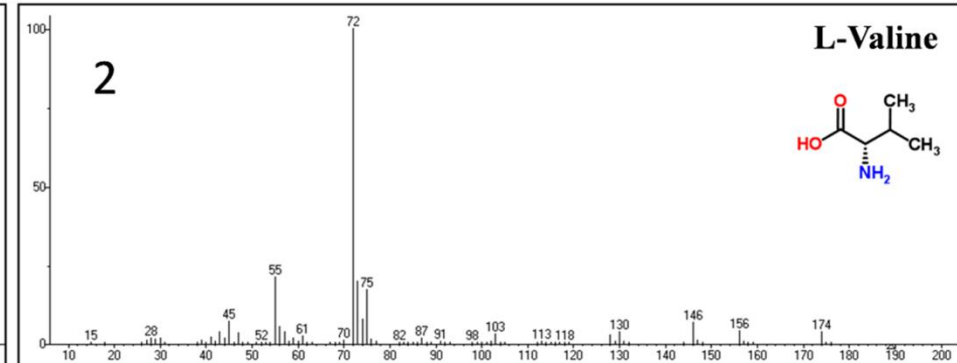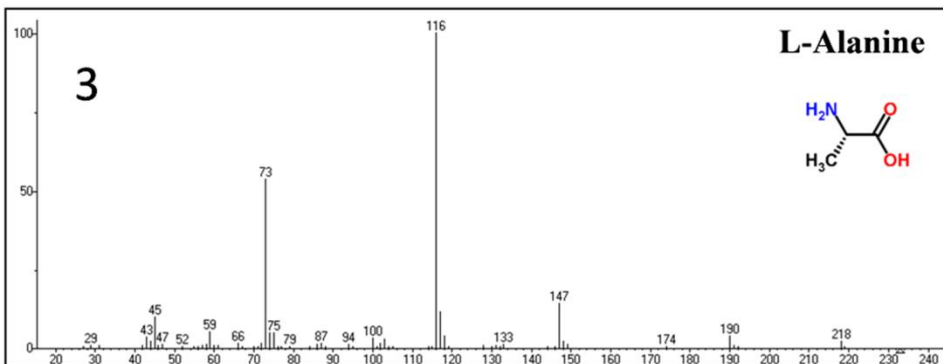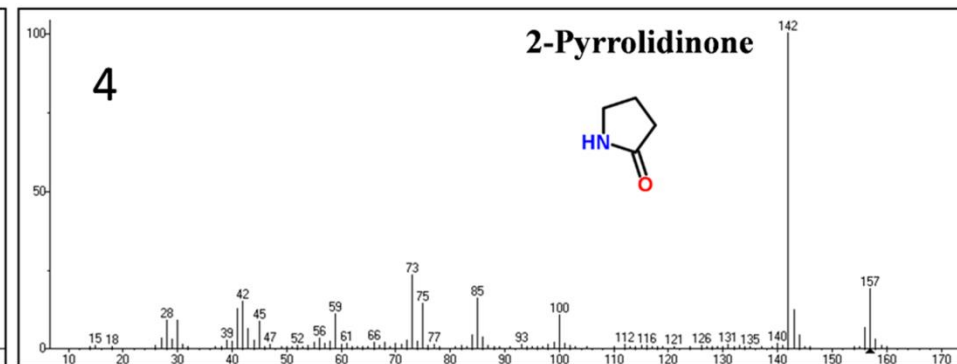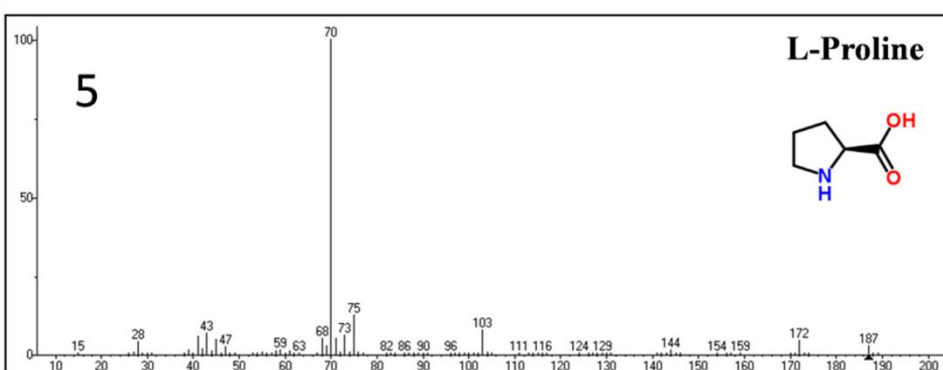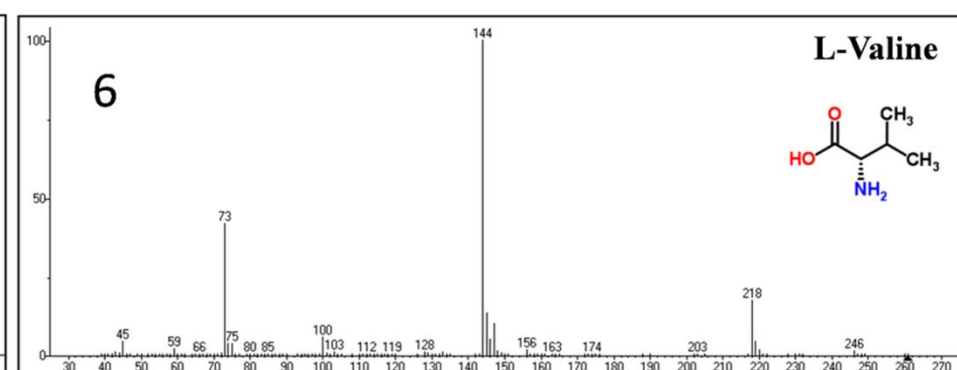

**Supplementary Fig S2.** Typical GC-MS fragmentation pattern of major identified metabolites (1-33) from methanol extract of leaves of *B. diffusa*.

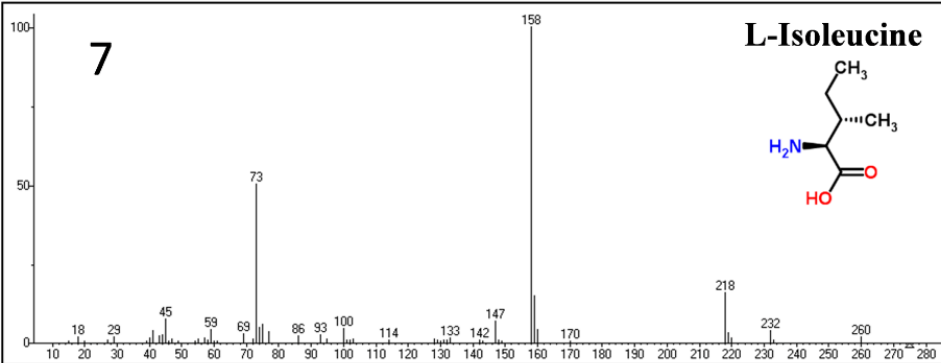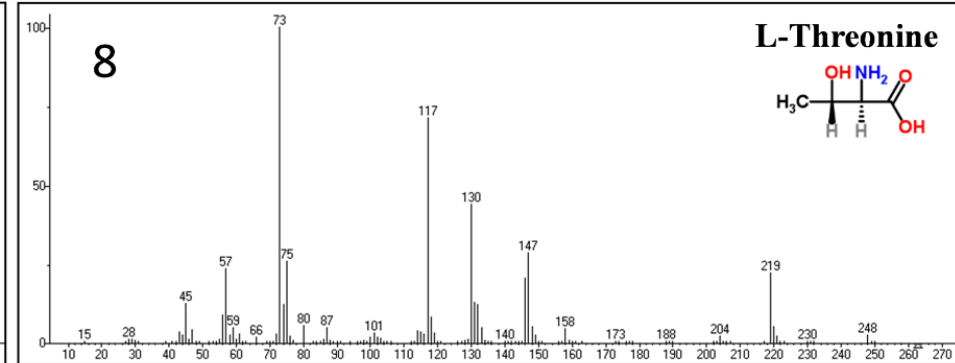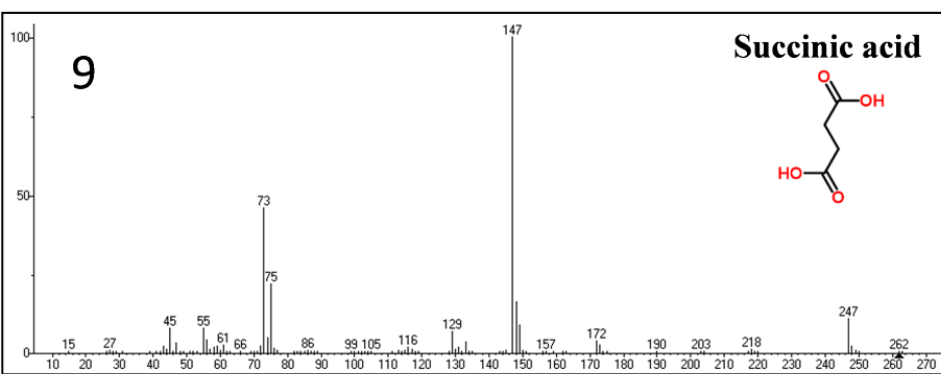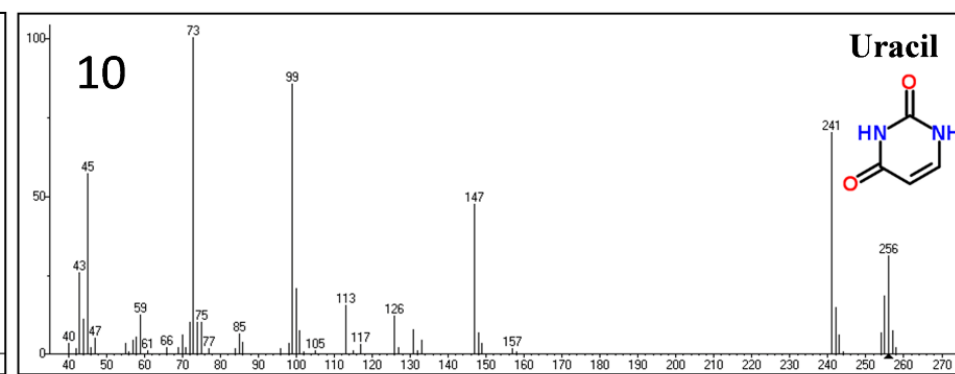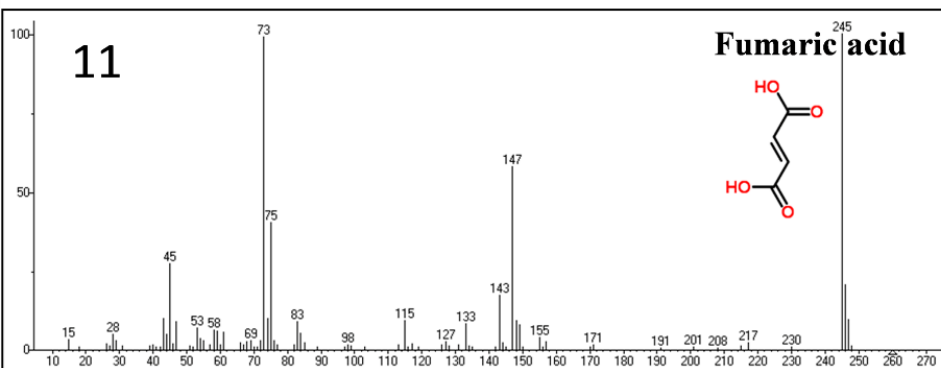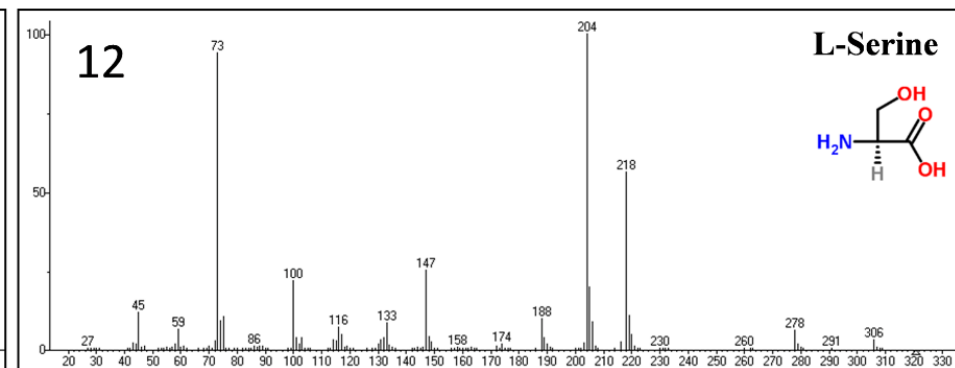

**Supplementary Fig S2 (continued).** Typical GC-MS fragmentation pattern of major identified metabolites (1-33) from methanol extract of leaves of *B. diffusa*.

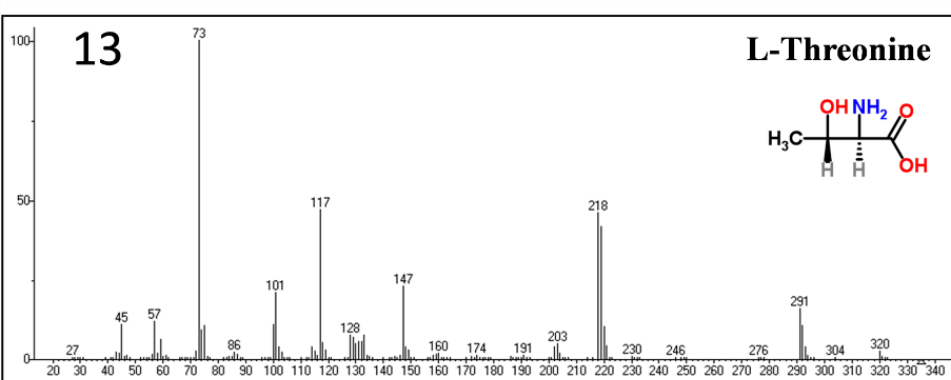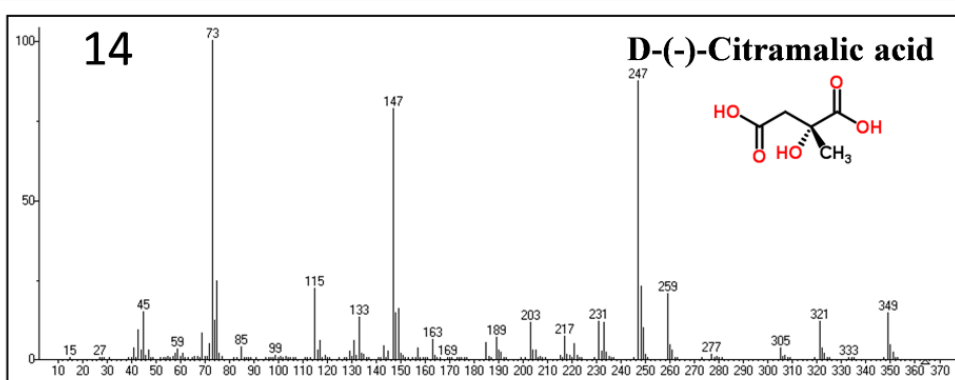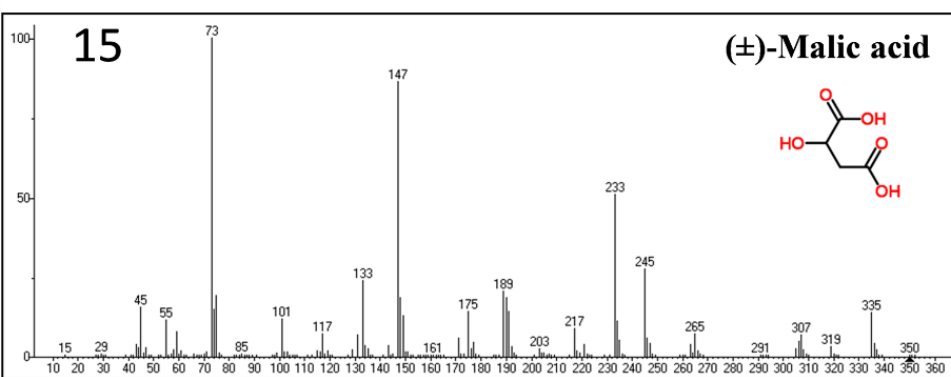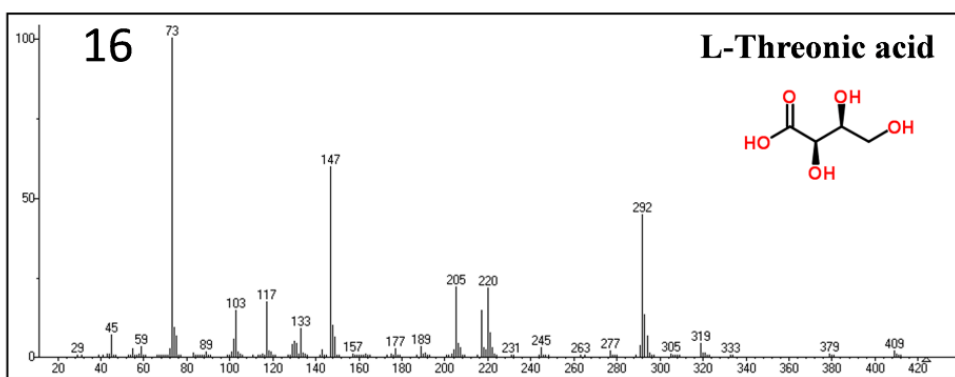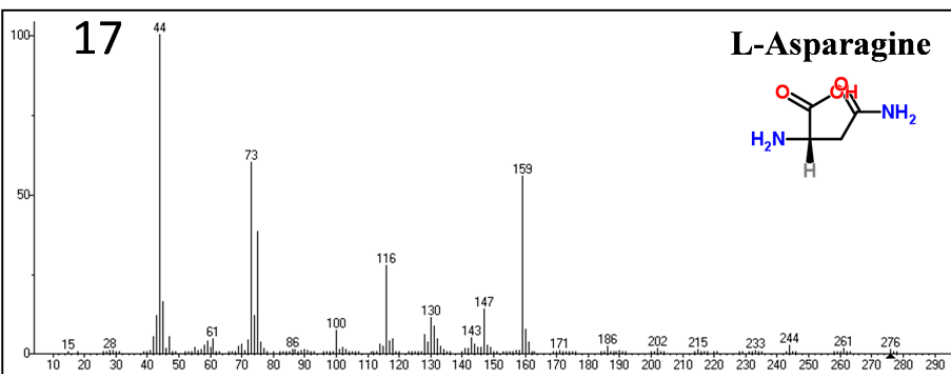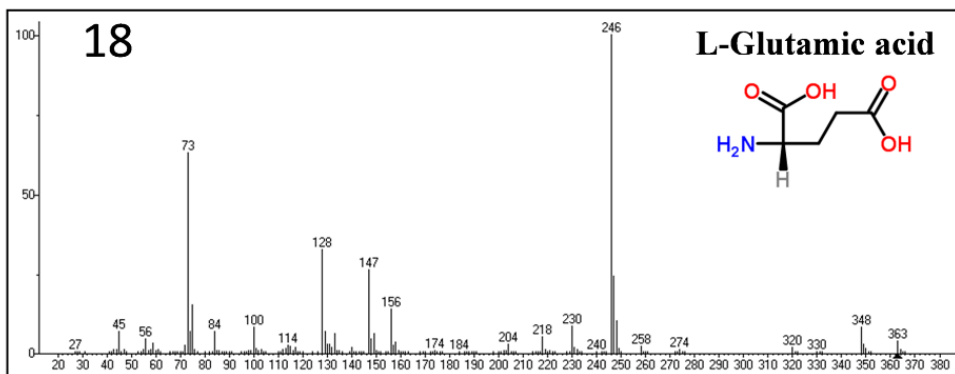

**Supplementary Fig S2 (continued).** Typical GC-MS fragmentation pattern of major identified metabolites (1-33) from methanol extract of leaves of *B. diffusa*.

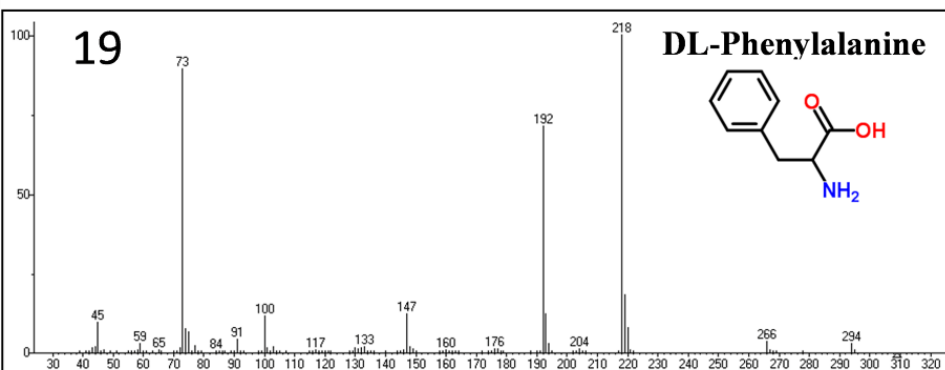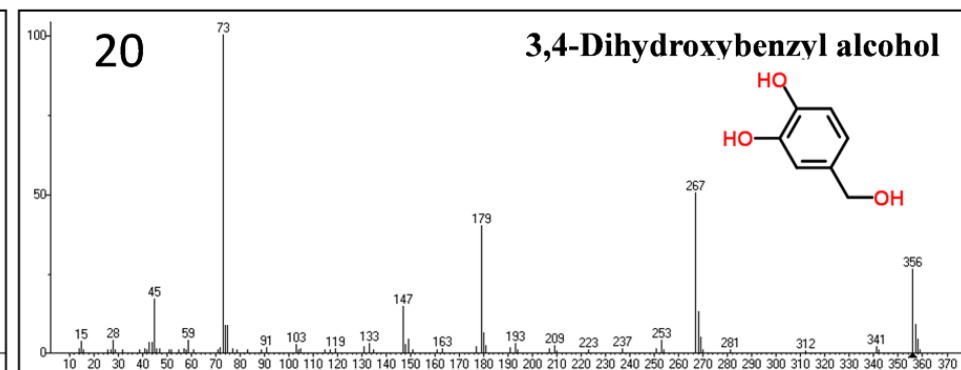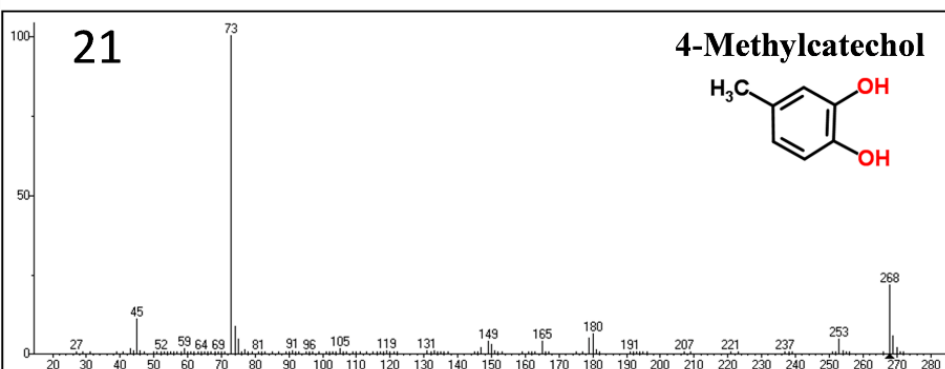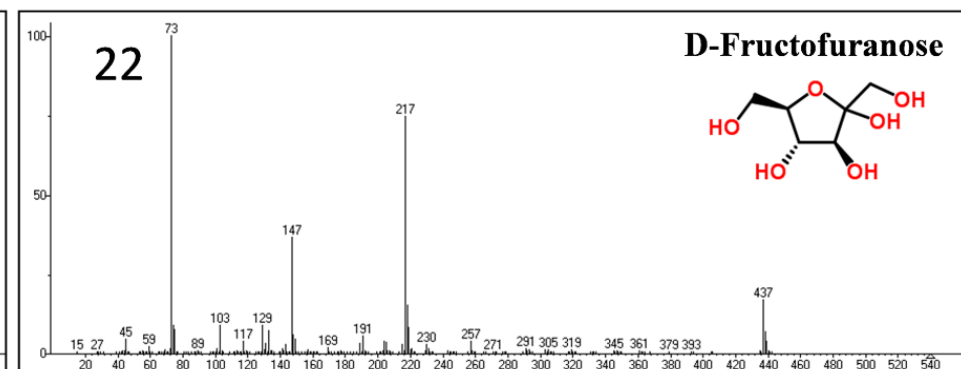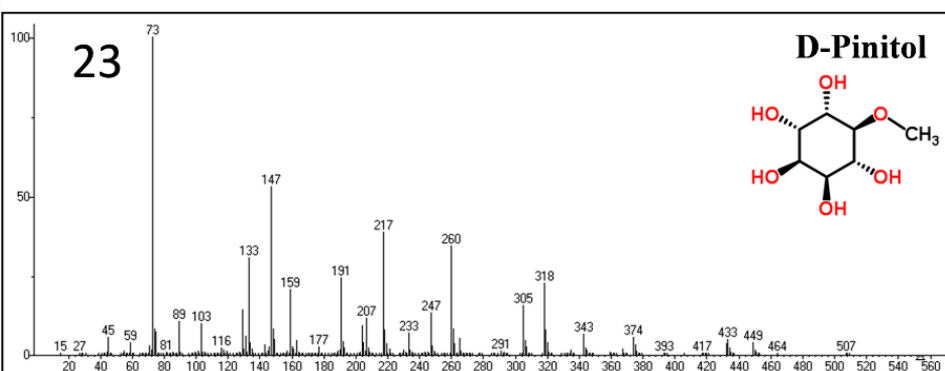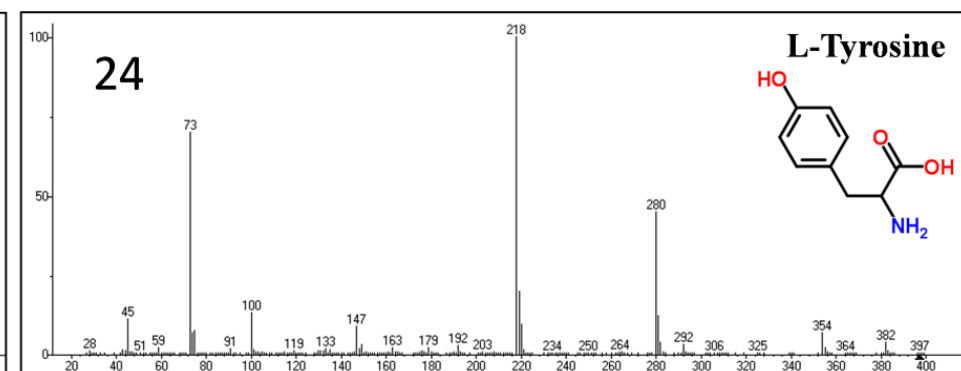

**Supplementary Fig S2 (continued).** Typical GC-MS fragmentation pattern of major identified metabolites (1-33) from methanol extract of leaves of *B. diffusa*.

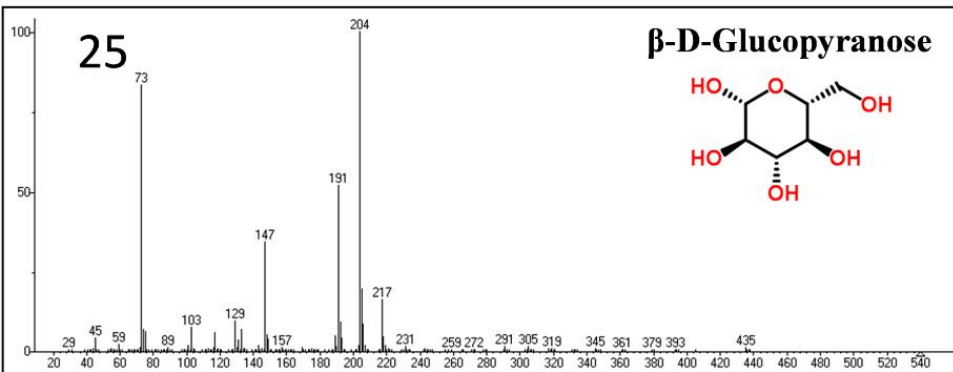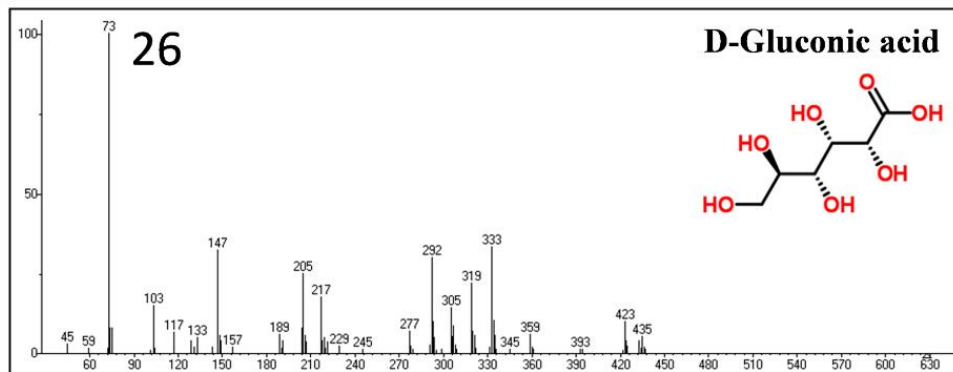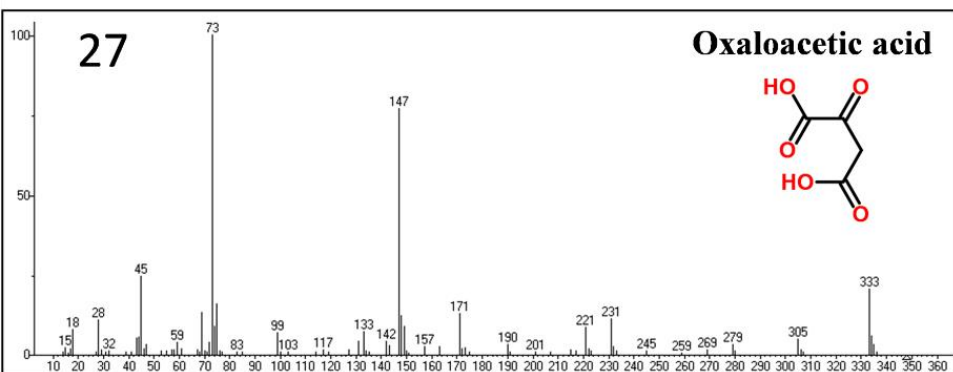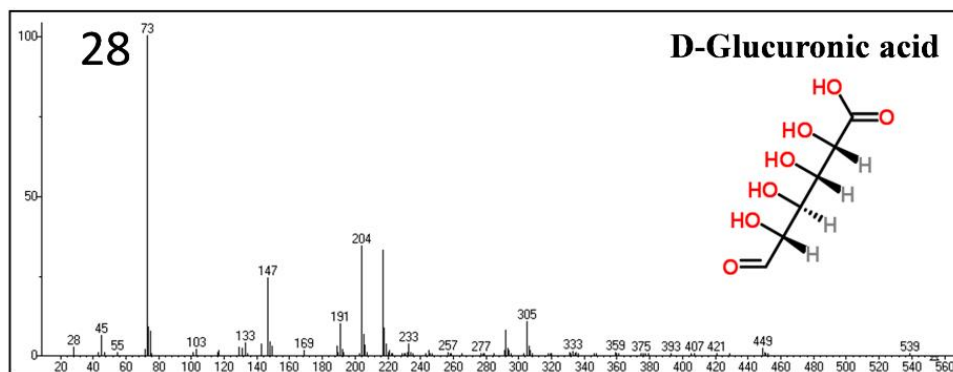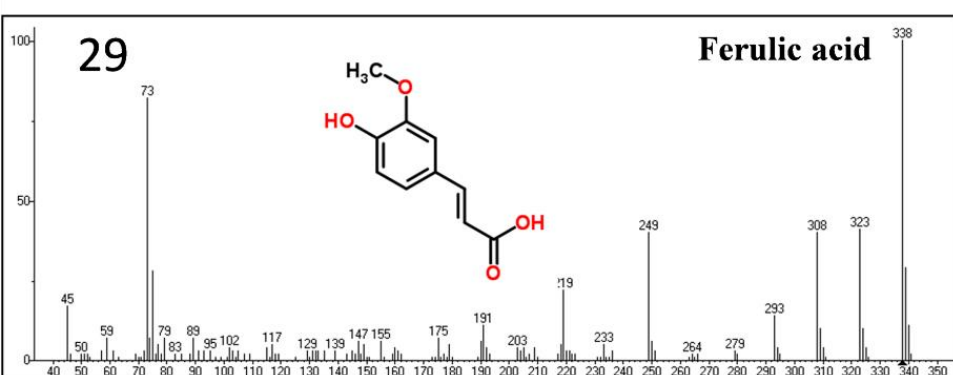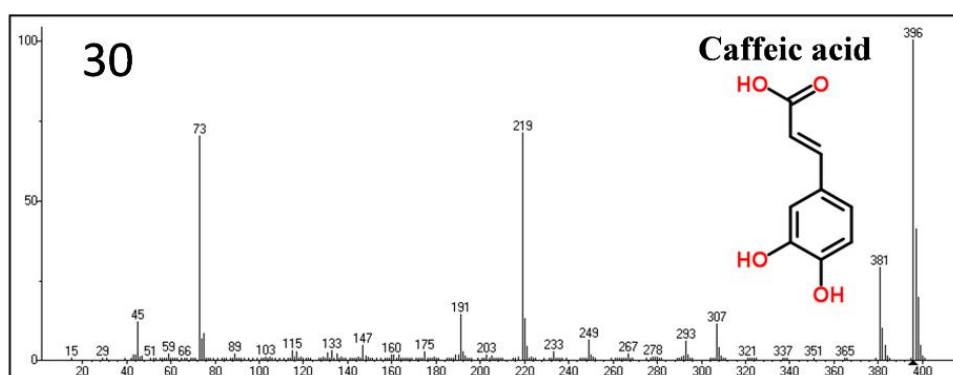

**Supplementary Fig S2 (continued).** Typical GC-MS fragmentation pattern of major identified metabolites (1-33) from methanol extract of leaves of *B. diffusa*.

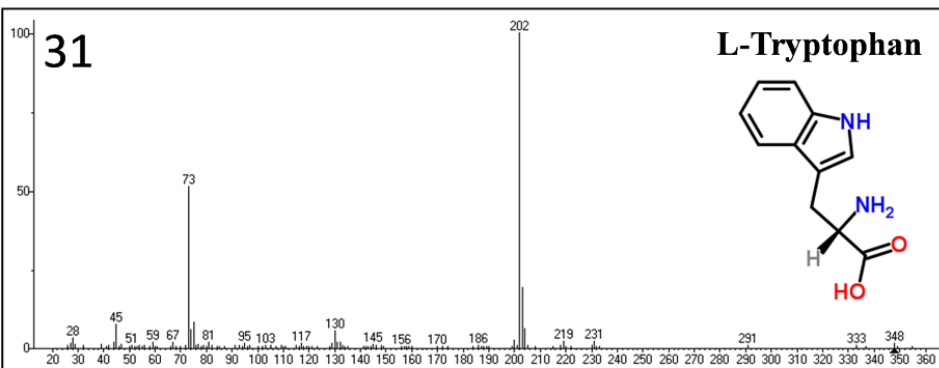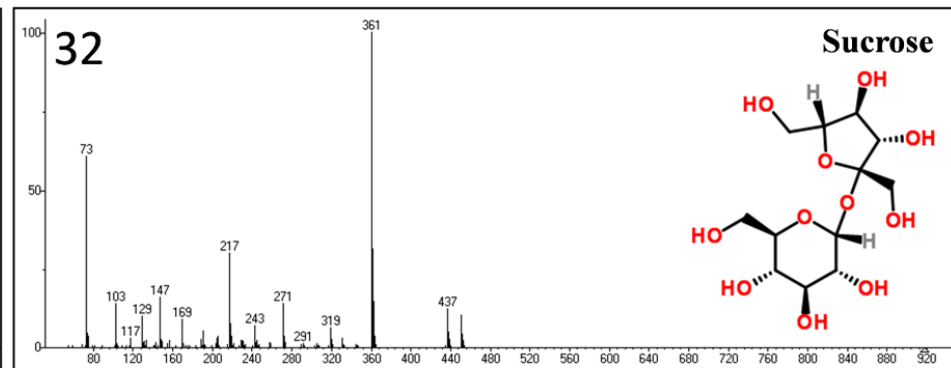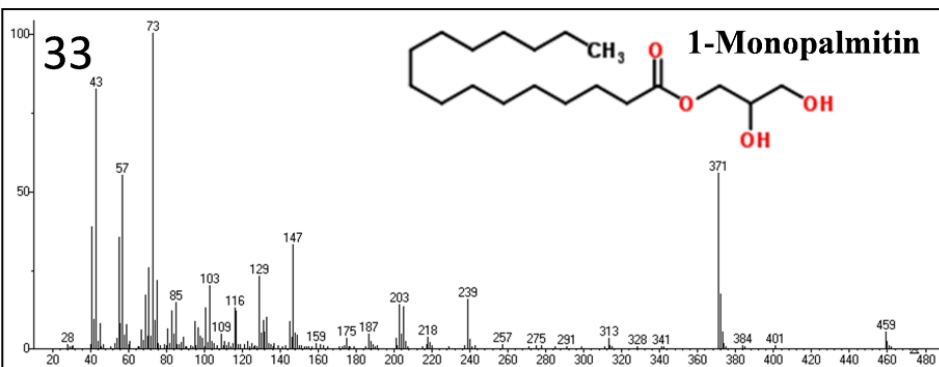

**Supplementary Fig S2 (continued).** Typical GC-MS fragmentation pattern of major identified metabolites (1-33) from methanol extract of leaves of *B. diffusa*.



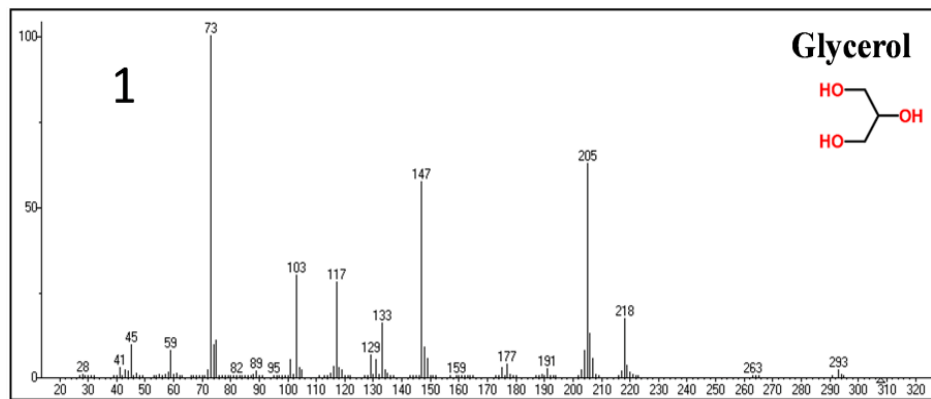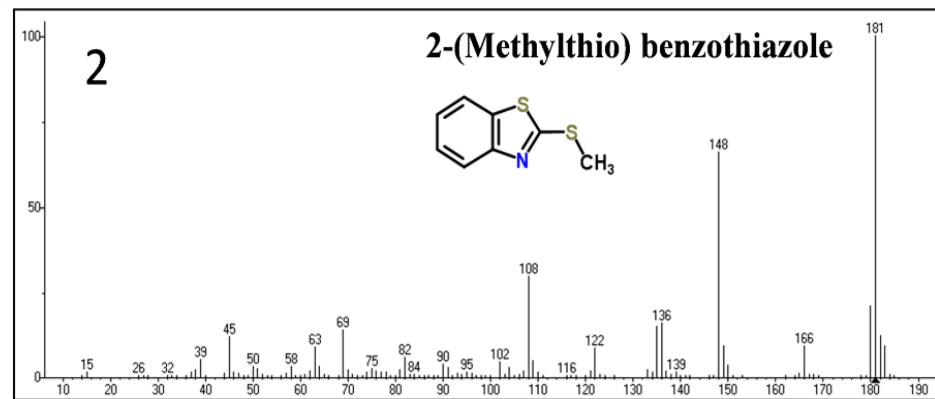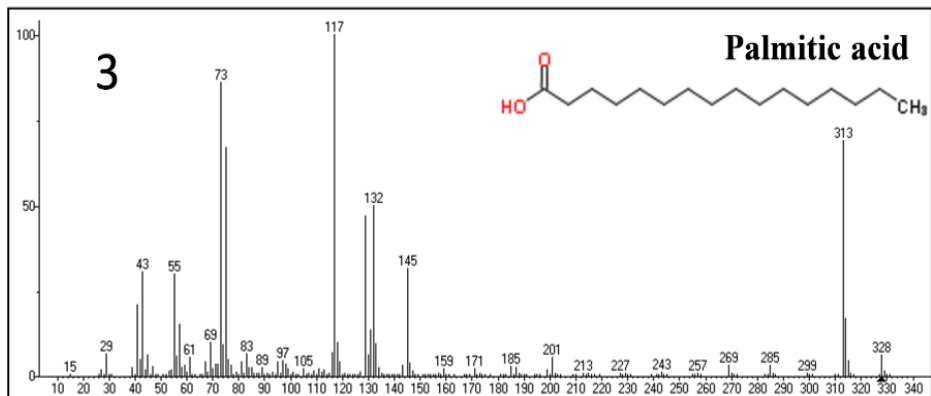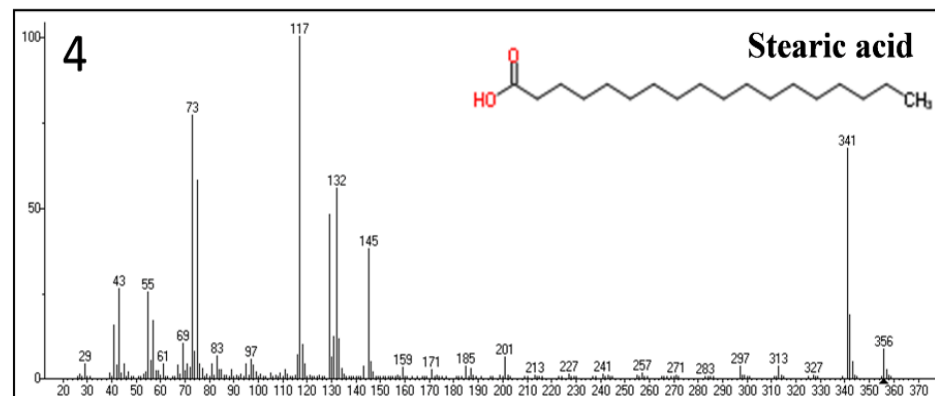

**Supplementary Fig S3.** Typical GC-MS fragmentation pattern of major identified metabolites (1-4) from chloroform extract of leaves of *B. diffusa*.
